# Supplementary material
Source: Springer Nature journal article supplement (https://www.springermedizin.de/resource/supplementary/12985_2010_967_MOESM9_ESM.pdf/9608846)

**A**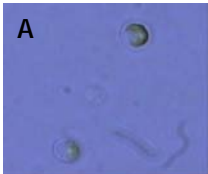**B**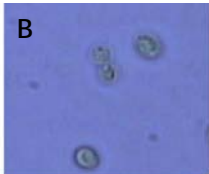**C**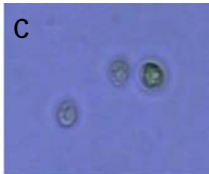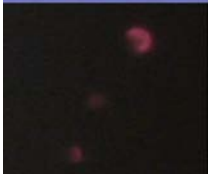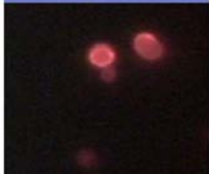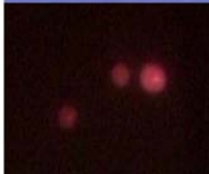

— 10  $\mu\text{m}$

Supplement: MOESM9 [file 9608846]
